# Supplementary material for: UV-A screening in Cladophora sp. lowers internal UV-A availability and photoreactivation as compared to non-UV screening in Ulva intestinalis
Source: Royal Society of Chemistry journal article supplement (doi:10.1039/c8pp00432c), 2018-12-13
Supplement: c8pp00432c1.pdf [file c8pp00432c1.pdf]

## UV-A screening in *Cladophora* sp. lowers internal UV-A availability and photoreactivation as compared to non-UV screening *Ulva intestinalis*

Author: Frauke Pescheck

### Electronic supplemental information

Table S1. Collection dates and locations of algal material used in the indicated experiments. Locations: DAEN = Dänisch-Nienhof, Schwedeneck, Kiel; FAL= Falckensteiner Strand, Friedrichsort, Kiel; FRI = light house Friedrichsort, Kiel; MWD = Marina Wentdorf, Stein, Kiel; NOK = Kiel channel, Holtenau, Kiel. Exp. No. refers to independent replication of the experiments, Uint = *U. intestinalis*, Csp. = *Cladophora* sp..

| Experiment                           | Exp. No. | Collection date | Location | Species    |
|--------------------------------------|----------|-----------------|----------|------------|
| DNA damage analysis <i>in situ</i>   | 1        | 01/06/15        | FAL      | Uint & Csp |
|                                      | 2        | 22/06/15        | FAL      | Uint & Csp |
|                                      | 3        | 21/07/15        | FAL      | Uint & Csp |
| Spectral transmittance               |          | 29/08/18        | FRI      | Uint & Csp |
| Repair under different conditions    | 1        | 28/07/15        | MWD      | Uint & Csp |
|                                      | 2        | 18/08/15        | NOK      | Uint       |
|                                      | 3        | 17/09/15        | FAL      | Uint & Csp |
|                                      | 4        | 27/07/16        | DAEN     | Csp        |
|                                      | 5        | 22/09/16        | FAL      | Uint & Csp |
| Dose-dependency of photoreactivation | 1        | 27/07/17        | FRI      | Uint & Csp |
|                                      | 2        | 11/08/17        | FRI      | Uint & Csp |
|                                      | 3        | 05/07/18        | FRI      | Uint & Csp |

Table S2. Photon flux densities of experimentally employed irradiation sources unweighted and weighted for photoreactivation (PR) and corrected for apparent UV screening in *U. intestinalis* and *Cladophora* sp.

| Irradiance source                           | UVA fluorescent tube                         | Metal halide lamp |
|---------------------------------------------|----------------------------------------------|-------------------|
|                                             | $\mu\text{mol photons m}^{-2} \text{s}^{-1}$ |                   |
| Unweighted                                  | 52.6                                         | 100               |
| Weighted for photoreactivation              | 48.5                                         | 13.9              |
| Internal PR-weighted <i>U. intestinalis</i> | 46.5                                         | 11.7              |
| Internal PR-weighted <i>Cladophora</i> sp.  | 26.2                                         | 10.9              |
